# Supplementary material for: The Impact of Water Potential and Temperature on Native Species’ Capability for Seed Germination in the Loess Plateau Region, China
Source: MDPI journal article supplement (doi:10.3390/plants13050693), 2024-02-29
Supplement: s1 [file s1]

# 1 Supplementary Figures and Tables

## 1.1 Supplementary Figures

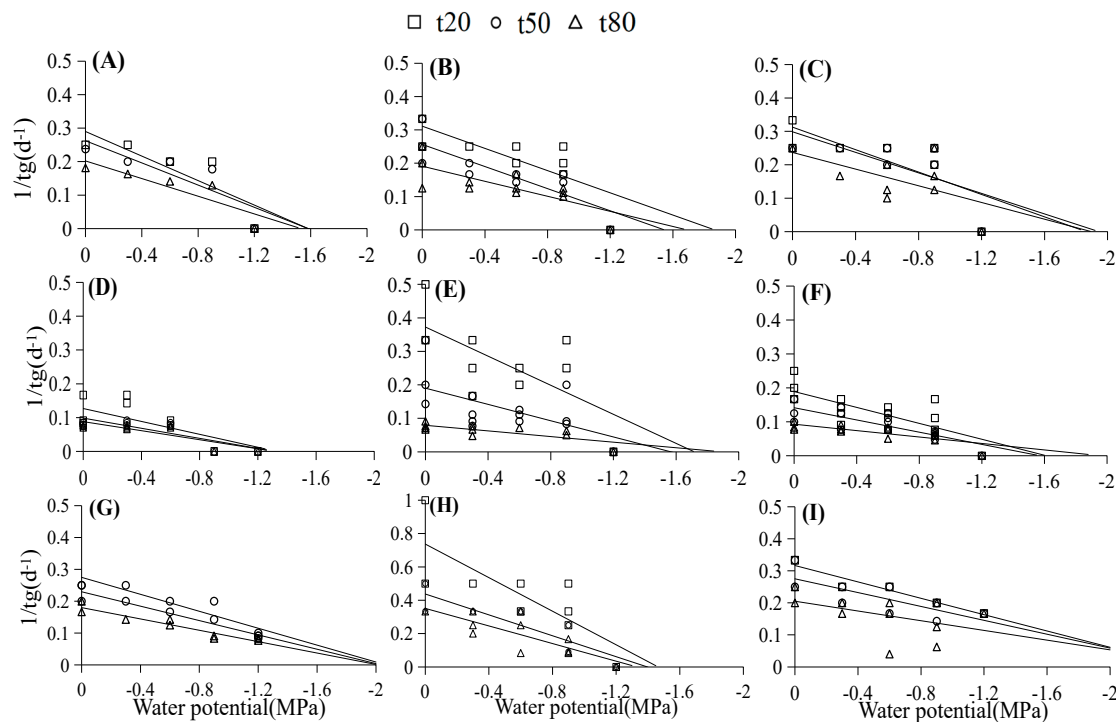

**Supplementary Figure S1.** Linear regression of germination rate (1/tg) of nine species (different percentiles) and water potentials; (A) *Artemisia scoparia*, (B) *Artemisia giraldii*, (C) *Artemisia sacrorum*, (D) *Periploca sepium*, (E) *Bothriochloa ischaemum*, (F) *Patrinia scabiosifolia* (G) *Linum usitatissimum*, (H) *Lespedeza davurica*, (I) *Sophora davidii*.

## 1.2 Supplementary Tables

**Supplementary Table S1** Estimation of cardinal temperatures for seed germination of nine species at 0MPa, using a linear regression analysis at different percentiles (20-80%).

| Species                   | percentiles | $T_b(^{\circ}\text{C})$ | $T_o(^{\circ}\text{C})$ | $T_c(^{\circ}\text{C})$ | Species                   | percentiles | $T_b(^{\circ}\text{C})$ | $T_o(^{\circ}\text{C})$ | $T_c(^{\circ}\text{C})$ | Species                   | percentiles | $T_b(^{\circ}\text{C})$ | $T_o(^{\circ}\text{C})$ | $T_c(^{\circ}\text{C})$ |
|---------------------------|-------------|-------------------------|-------------------------|-------------------------|---------------------------|-------------|-------------------------|-------------------------|-------------------------|---------------------------|-------------|-------------------------|-------------------------|-------------------------|
| <i>Artemisia scoparia</i> | 20          | 6.23                    | 30.76                   | 45.05                   | <i>Artemisia giraldii</i> | 20          | 3.35                    | 29.58                   | 39.52                   | <i>Artemisia sacrorum</i> | 20          | 3.40                    | 29.81                   | 39.52                   |
|                           | 30          | 5.86                    | 31.45                   | 45.05                   |                           | 30          | 3.90                    | 29.38                   | 40.15                   |                           | 30          | 2.35                    | 29.15                   | 40.15                   |
|                           | 40          | 5.43                    | 30.52                   | 46.67                   |                           | 40          | 4.08                    | 29.71                   | 40.15                   |                           | 40          | 2.43                    | 29.35                   | 40.15                   |

|                           |    |      |       |       |           |    |      |       |       |            |    |       |       |       |
|---------------------------|----|------|-------|-------|-----------|----|------|-------|-------|------------|----|-------|-------|-------|
|                           | 50 | 6.14 | 30.61 | 46.67 |           | 50 | 2.80 | 29.01 | 39.76 |            | 50 | 1.85  | 29.12 | 39.76 |
|                           | 60 | 6.36 | 31.30 | 46.67 |           | 60 | 2.26 | 29.42 | 43.05 |            | 60 | 1.57  | 29.25 | 38.07 |
|                           | 70 | 4.70 | 31.66 | 49.90 |           | 70 | 2.98 | 29.27 | 38.24 |            | 70 | 1.31  | 28.98 | 38.24 |
|                           | 80 | 4.54 | 31.16 | 47.14 |           | 80 | 2.52 | 27.32 | 40.85 |            | 80 | 1.09  | 29.96 | 40.30 |
| Periploca<br>sepium       | 20 | 6.65 | 32.86 | 42.54 |           | 20 | 6.67 | 30.27 | 40.45 |            | 20 | 3.53  | 29.20 | 38.64 |
|                           | 30 | 4.51 | 34.00 | 49.90 |           | 30 | 7.46 | 31.85 | 40.00 |            | 30 | 3.94  | 29.92 | 38.64 |
|                           | 40 | 4.64 | 34.51 | 49.90 | Bothrioch | 40 | 7.17 | 32.51 | 38.48 |            | 40 | 2.89  | 31.27 | 38.64 |
|                           | 50 | 3.63 | 36.10 | 49.90 | loa       | 50 | 8.44 | 31.68 | 39.89 | Patrinia   | 50 | 3.39  | 30.79 | 38.63 |
|                           | 60 | 3.39 | 36.73 | 49.90 | ischaemu  | 60 | 8.18 | 31.59 | 39.08 | scabiosaef | 60 | 4.05  | 31.20 | 38.63 |
|                           | 70 | 3.83 | 34.82 | 46.00 | m         | 70 | 8.93 | 33.87 | 41.60 | olia       | 70 | 1.37  | 30.44 | 39.75 |
|                           | 80 | 1.73 | 34.56 | 49.15 |           | 80 | 9.67 | 32.52 | 41.73 |            | 80 | -7.46 | 30.46 | 41.41 |
| Linum<br>usitatissm<br>um | 20 | 4.34 | 29.98 | 40.29 |           | 20 | 6.44 | 19.26 | 41.85 |            | 20 | 6.35  | 24.05 | 42.11 |
|                           | 30 | 4.62 | 29.82 | 40.04 |           | 30 | 6.93 | 16.75 | 48.03 |            | 30 | 6.66  | 24.05 | 40.62 |
|                           | 40 | 4.88 | 29.72 | 39.86 |           | 40 | 6.94 | 15.65 | 47.68 |            | 40 | 6.64  | 24.18 | 40.55 |
|                           | 50 | 4.67 | 29.71 | 39.86 | Lespedeza | 50 | 6.96 | 15.67 | 47.48 | Sophora    | 50 | 6.46  | 24.09 | 40.55 |
|                           | 60 | 4.71 | 30.11 | 39.73 | davurica  | 60 | 7.37 | 15.28 | 46.43 | davidii    | 60 | 6.47  | 24.28 | 40.37 |
|                           | 70 | 5.28 | 30.20 | 39.55 |           | 70 | 7.24 | 15.17 | 52.40 |            | 70 | 6.25  | 24.33 | 40.37 |
|                           | 80 | 3.86 | 29.12 | 40.22 |           | 80 | 6.50 | 15.81 | 61.96 |            | 80 | 6.11  | 24.26 | 40.68 |

**Supplementary Table S2** Estimation of cardinal water potential for seed germination of nine species at 20°C, using a linear regression analysis at different percentiles (20-80%).

| Species                    | percentiles | $\Psi_b$ (MPa) | Species                       | percentiles | $\Psi_b$ (MPa) | Species                        | percentiles | $\Psi_b$ (MPa) |
|----------------------------|-------------|----------------|-------------------------------|-------------|----------------|--------------------------------|-------------|----------------|
| <i>Artemisia scoparia</i>  | 20          | -1.58          | <i>Artemisia giraldii</i>     | 20          | -1.87          | <i>Artemisia sacrorum</i>      | 20          | -1.86          |
|                            | 50          | -1.58          |                               | 50          | -1.55          |                                | 50          | -1.95          |
|                            | 80          | -1.53          |                               | 80          | -1.69          |                                | 80          | -1.90          |
| <i>Periploca sepium</i>    | 20          | -1.33          | <i>Bothriochloa ischaemum</i> | 20          | -1.72          | <i>Patrinia scabiosaefolia</i> | 20          | -1.61          |
|                            | 50          | -1.32          |                               | 50          | -1.57          |                                | 50          | -1.57          |
|                            | 80          | -1.32          |                               | 80          | -1.89          |                                | 80          | -1.96          |
| <i>Linum usitatissimum</i> | 20          | -2.07          | <i>Lespedeza davurica</i>     | 20          | -1.46          | <i>Sophora davidii</i>         | 20          | -2.48          |
|                            | 50          | -2.04          |                               | 50          | -1.40          |                                | 50          | -2.55          |
|                            | 80          | -2.02          |                               | 80          | -1.33          |                                | 80          | -2.71          |
